# Supplementary material for: High-throughput probing macrophage–bacteria interactions at the single cell level with microdroplets
Source: Royal Society of Chemistry journal article supplement (doi:10.1039/d2lc00516f), 2022-01-01
Supplement: d2lc00516f1.pdf [file d2lc00516f1.pdf]

**Supporting information for**  
**High-throughput Probing Macrophage-bacteria Interactions**  
**at the Single Cell Level with Microdroplets**

Zhongyun Jiang<sup>†</sup>, Sidi Liu<sup>†</sup>, Xiang Xiao, Guimei Jiang, Qing Qu, Xingxing Miao,  
Renfei Wu, Rui Shi, Ruochen Guo, Jian Liu\*

Institute of Functional Nano and Soft Materials (FUNSOM), Jiangsu Key Laboratory  
for Carbon-Based Functional Materials and Devices, Soochow University, Suzhou,  
Jiangsu Province, China 215123.

<sup>†</sup> These authors contributed to this manuscript equally.

\*Email: [jliu@suda.edu.cn](mailto:jliu@suda.edu.cn)

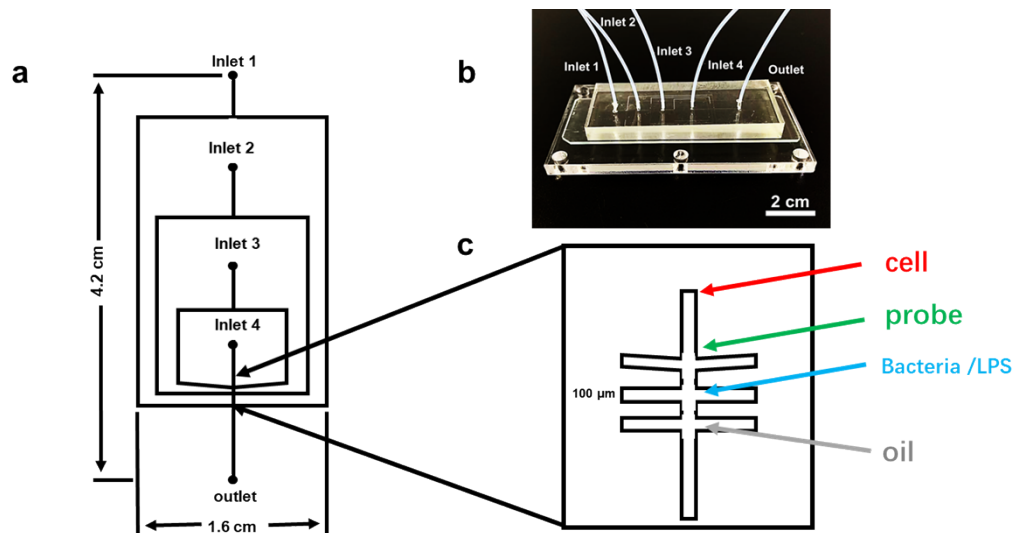

**Figure S1.** Specification of the microfluidic device for droplet generation. (a) Structure diagram of the microfluidic device. Length: 4.2 cm; width: 1.6 cm. (b) Photo of the microfluidic device. Scale bar: 2 cm. (c) Zoomed-in view of the cross channels for droplet generation. Feature dimension: channel width: 100  $\mu$  m; channel height: 50  $\mu$  m. The arrows in the different colors indicate the sequence of loading samples or reagents.

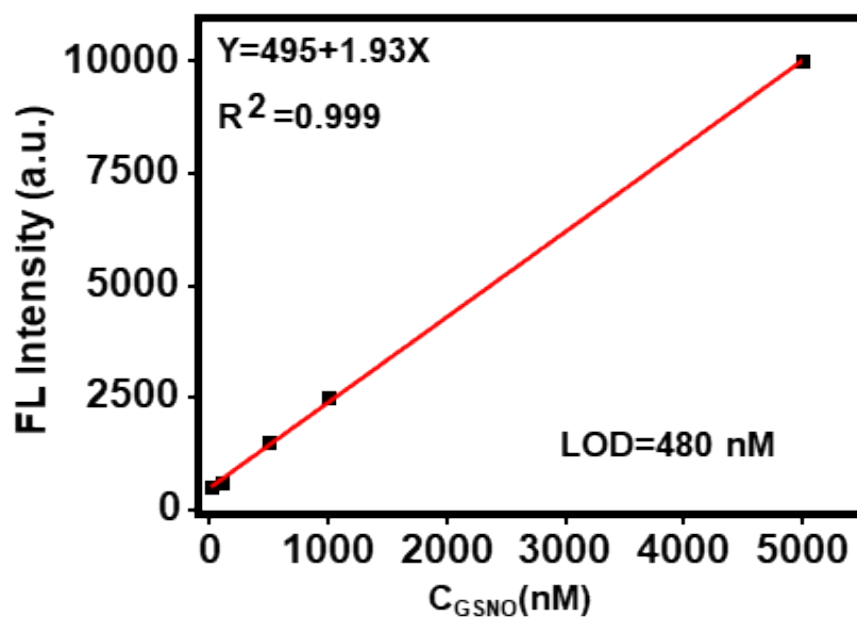

**Figure S2.** The standard curve of NO measured in the format of 96-well microplate. GSNO as the donor of NO; DAF-2 as the fluorescent probe. Limit of detection: 480 nM.

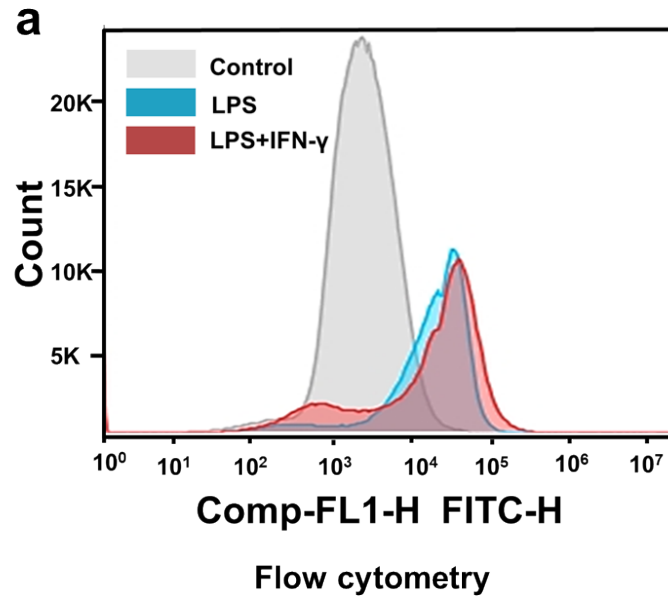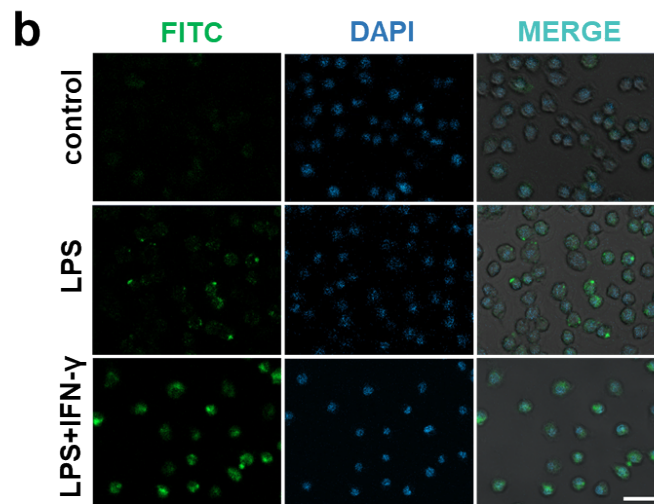

Zeiss confocal image

**Figure S3.** Validation of macrophage polarization with the probe of DAF-FM DA. (a) Flow cytometry data of the macrophage polarization by different stimuli, including PBS control, LPS, and LPS+IFN- $\gamma$ . Macrophages: RAW264.7 cells. LPS concentration: 250 ng/mL; IFN- $\gamma$  concentration: 100 ng/mL. (b) Fluorescent images of the macrophage polarization under the identical condition as above.

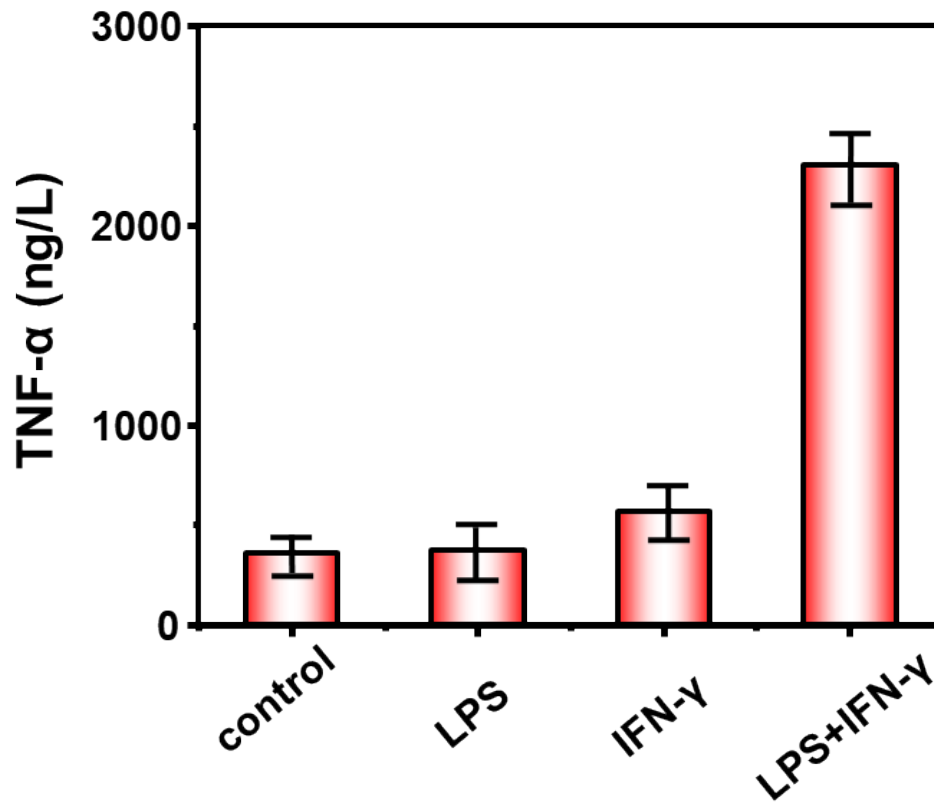

**Figure S4.** ELISA measurements of TNF- $\alpha$  secretion by the macrophages after different stimulations, including PBS control, LPS, IFN- $\gamma$ , and LPS+IFN- $\gamma$ . Macrophages: RAW264.7 cells. LPS concentration: 250 ng/mL; IFN- $\gamma$  concentration: 100 ng/mL. Error bar: standard deviation (n=3).

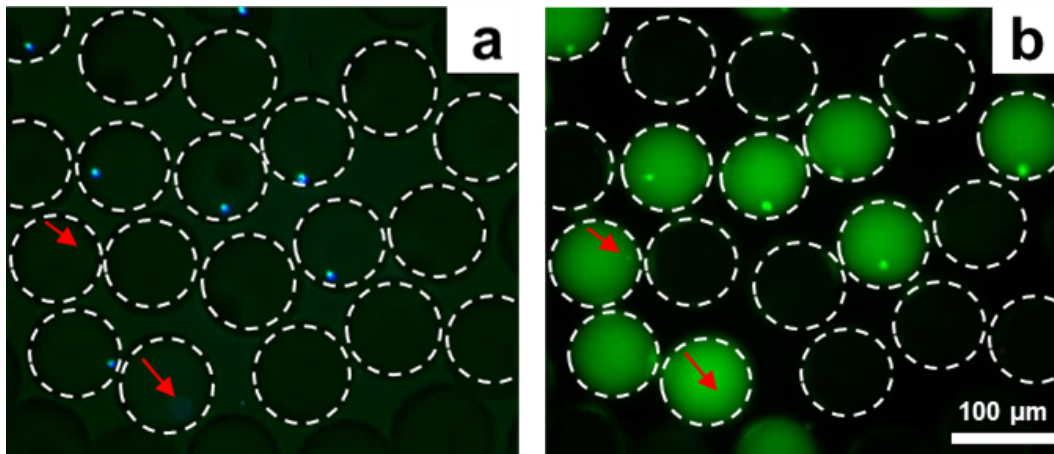

**Figure S5.** Detection of extracellular NO secretion by a single macrophage encapsulated in the droplet. (a) Fluorescent image at the Hoechst channel. (b) Merged image of both the Hoechst channel and the DAF-2 channel. Macrophages (RAW264.7 cells) were pre-stained by the live-cell Hoechst dye, followed the polarization step with LPS+IFN- $\gamma$ . LPS concentration: 250 ng/mL; IFN- $\gamma$  concentration: 100 ng/mL. White dashed circles as a visual guide for the droplets. Scale bar. 100  $\mu$ m. Red arrows indicated the potential locations of the macrophage nuclei (out-of-focus during image acquisition) inside the droplets.

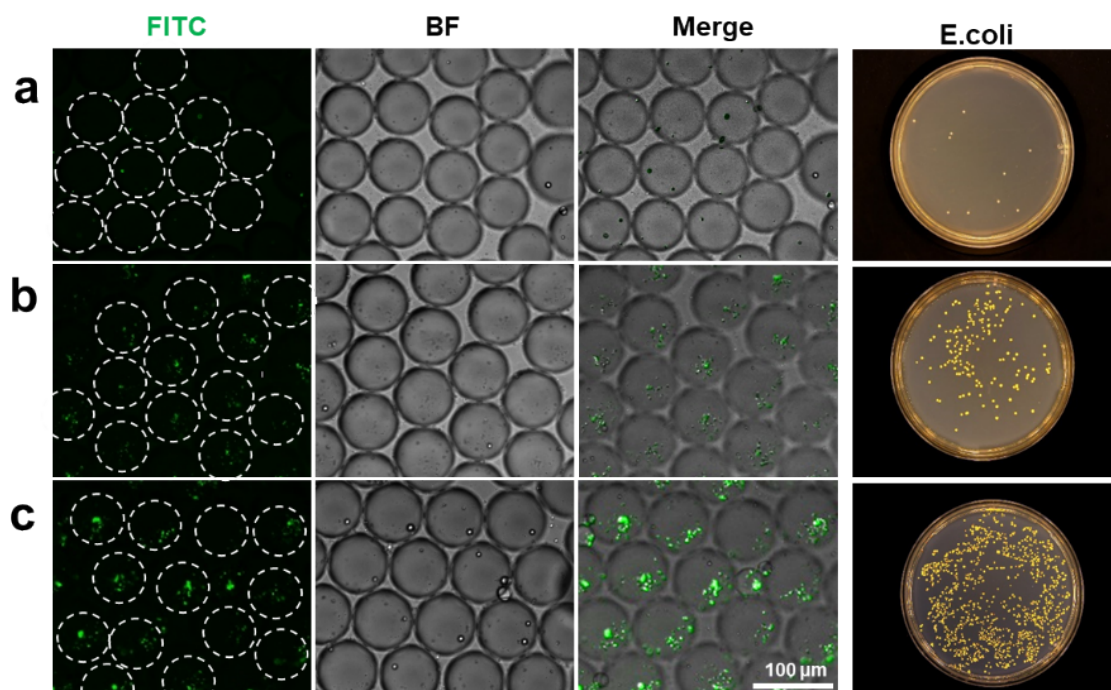

**Figure S6.** Encapsulation of *E. coli* by the droplets and bacteria counting. (a-c) *E. coli* loading concentrations:  $1.0 \times 10^7$  CFU/mL,  $1.0 \times 10^8$  CFU/mL, and  $1.0 \times 10^9$  CFU/mL respectively. The number of *E. coli* in each droplet on the average: (a) 1-2 *E. coli*. per droplet; (b) 15-20 *E. coli* per droplet; (c) 150-200 *E. coli* per droplet.
